# Supplementary material for: Rapid and precise determination of the 238Pu/239Pu isotope ratio using thermal ionization mass spectrometry
Source: Royal Society of Chemistry journal article supplement (doi:10.1039/d3ja00307h), 2023-11-29
Supplement: d3ja00307h1.pdf [file d3ja00307h1.pdf]

## Supporting Information

**Figure S.I. 1. Chemical structures of the components used for preparing the supported liquid membrane.**

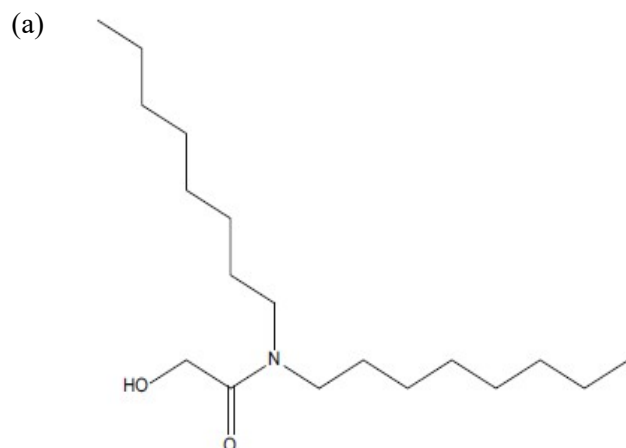

N,N'-dioctyl- $\alpha$ -hydroxyacetamide (DOHA)

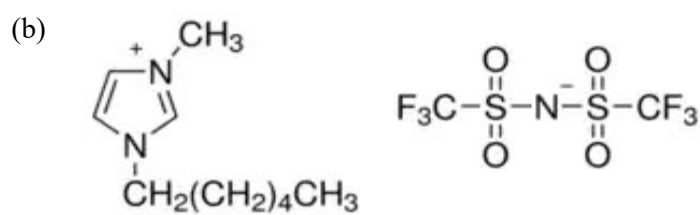

1-hexyl-3-methylimidazolium bis(trifluoromethyl-sulfonyl)imide  
[C<sub>6</sub>mim][NTf<sub>2</sub>]

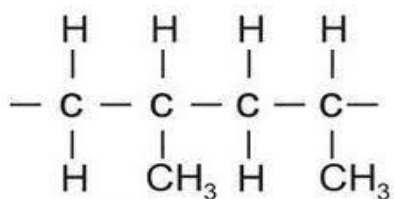

Polypropylene (PP)

**Table S.I. 1 Isotopic composition of uranium solutions.**

| Standard / Spike                  | Nuclide          | Atom % abundance |
|-----------------------------------|------------------|------------------|
| SRM 950b<br>natural Uranium       | <sup>234</sup> U | 0.005            |
|                                   | <sup>235</sup> U | 0.720            |
|                                   | <sup>238</sup> U | 99.27            |
| <sup>233</sup> U – spike solution | <sup>233</sup> U | 99.703           |
|                                   | <sup>234</sup> U | 0.237            |
|                                   | <sup>235</sup> U | 0.014            |
|                                   | <sup>238</sup> U | 0.047            |

**Table S.I. 2 Abundance of plutonium isotopes of NIST–SRM–947**

| Isotope                              | Atom % abundance                                         |                                                        |
|--------------------------------------|----------------------------------------------------------|--------------------------------------------------------|
|                                      | Certified [31]<br>(as on 01 <sup>st</sup> January, 1982) | Decay corrected<br>(as on 01 <sup>st</sup> June, 2022) |
| <sup>238</sup> Pu/ <sup>239</sup> Pu | 0.00361 ± 0.00008@                                       | 0.00264 ± 0.00006*                                     |
| <sup>240</sup> Pu/ <sup>239</sup> Pu | 0.2414 ± 0.0003@                                         | 0.24068 ± 0.0003*                                      |
| <sup>241</sup> Pu/ <sup>239</sup> Pu | 0.03659 ± 0.00008@                                       | 0.0054 ± 0.0001#                                       |
| <sup>242</sup> Pu/ <sup>239</sup> Pu | 0.01559 ± 0.00005@                                       | 0.01561 ± 0.00005*                                     |

@ Based on the propagation of the uncertainties quoted for the respective abundances

\* Based on the similarities in the magnitude of the certified values

# Since the magnitude has been drastically changed a RSD of ~ 2% has been chosen similar to that <sup>238</sup>Pu/<sup>239</sup>Pu in the certified value

**Table S.I. 3 Specifications of TIMS instrumentation used in the present study.**

| <b>Parameter</b>                               | <b>Thermal Ionization Mass Spectrometer</b>                                                                                                                             |
|------------------------------------------------|-------------------------------------------------------------------------------------------------------------------------------------------------------------------------|
| Model                                          | Thermo Fisher make TRITON Plus model single focusing thermal ionization mass spectrometer                                                                               |
| Acceleration voltage                           | 10 kV                                                                                                                                                                   |
| Ion source                                     | Thermal ionization                                                                                                                                                      |
| Filament geometry & dimensions                 | Flat, high-purity rhenium filaments arranged as double filament assembly                                                                                                |
| Filament dimensions                            | 10mm X 1mm X 0.04 mm                                                                                                                                                    |
| Filament resistance                            | 8 $\Omega$ /10 mm filament length                                                                                                                                       |
| Detectors                                      | Nine variable Faraday cup transducers, designated as L4, L3, L2, L1,Ax (reference cup), H1, H2, H3, H4 each coupled to a $10^{11}$ ohms resistor<br><br>SEM ion counter |
| Mass resolution ( $\Delta M/M$ ) at 10% valley | 450 at m/z 238 a.m.u.                                                                                                                                                   |
| Abundance sensitivity                          | 20 ppb (at m/z = 237)                                                                                                                                                   |

**Table S.I. 4 The compositions of various samples encountered in a nuclear fuel cycle.**

| <b>Sample</b>                          | <b>U:Pu weight ratio</b> |
|----------------------------------------|--------------------------|
| <b>(U,Pu)C fuel</b>                    | <b>0.33</b>              |
| <b>(U,Pu)O<sub>2</sub> fuel</b>        | <b>25</b>                |
| <b>Dissolver solution of PHWR fuel</b> | <b>200</b>               |
| <b>Dissolver solution of RR fuel*</b>  | <b>1000</b>              |
